# Supplementary material
Source: publisher figshare collection journal article supplement (https://brill.figshare.com/articles/dataset/_/3145855)
Supplement: Supplementary file 1 [file 1]

## **Vocal repertoire of adult captive red pandas (*Ailurus fulgens*)**

**Dandan Cao<sup>1</sup>, Hong Zhou<sup>1</sup>, Wei Wei<sup>1</sup>, Miaowen Lei<sup>1</sup>, Shibin Yuan<sup>1</sup>, Dunwu Qi<sup>2</sup> and  
Zejun Zhang<sup>1</sup>**

<sup>1</sup>Giant Panda Conservation and Culture Research Center, China West Normal University,  
Shida Road 1#, Nanchong 637009, China

<sup>2</sup>Chengdu Research Base of Giant Panda Breeding, Panda Road 1375#, Chengdu 610081,  
China

### **Supplementary Videos**

**Video 1.** Bleats uttered by a male red panda after scent marking.

**Video 2.** Bleats uttered by a male red panda before mounting, and a twitter emitted by a female.

**Video 3.** Squeals, barks and growls uttered by a female during fighting.

**Video 4.** Squeals, barks and growls uttered by a female and grunts uttered by a male during fighting.

**Video 5.** Grunts uttered by a female when she was threatened by other aggressive individuals.

**Video 6.** Growls, squeals and grunts uttered by a female when she was chased by a male.

**Video 7.** Hoots uttered by a female when she saw that an aggressive individual came close to her.

**Video 8.** Twitters uttered by a female during mating, and a bleat uttered by a male before mounting.
